# Supplementary material for: Efficacy of Electrical Stimulators for Bone Healing: A Meta-Analysis of Randomized Sham-Controlled Trials
Source: PubMed Central journal article supplement (PMC4990885; doi:10.1038/srep31724), 2016-08-19
Supplement: srep31724-s1.pdf [file srep31724-s1.pdf]

**Efficacy of Electrical Stimulators for Bone Healing:  
A Meta-Analysis of Randomized Sham-Controlled Trials**

Ilyas S. Aleem<sup>\*1,2</sup>, Idris Aleem<sup>3</sup>, Nathan Evaniew<sup>1,2</sup>, Jason W. Busse<sup>2,4,5</sup>, Michael Yaszemski<sup>6</sup>, Arnav Agarwal<sup>7</sup>, Thomas Einhorn<sup>8</sup> and Mohit Bhandari<sup>1,2</sup>

<sup>1</sup>*Division of Orthopaedics, Department of Surgery, McMaster University, Hamilton, ON;* <sup>2</sup>*Department of Clinical Epidemiology and Biostatistics, McMaster University, Hamilton, ON;* <sup>3</sup>*Thalamic Labs, Kitchener, ON;* <sup>4</sup>*The Michael G. DeGroot Institute for Pain Research and Care, McMaster University, Hamilton, ON;* <sup>5</sup>*Department of Anesthesia, McMaster University, Hamilton, ON;* <sup>6</sup>*Department of Orthopaedics, Mayo Clinic, Rochester, MN;* <sup>7</sup>*University of Toronto Faculty of Medicine, Toronto, ON;* <sup>8</sup>*Department of Orthopaedic Surgery, New York University Langone Medical Center, New York, NY*

## Appendix 1. Search Strategy (conducted March 6, 2016)

| MEDLINE                                                                                                                                                                                                                                                                                                                                                                                                                                                                                                                                                                                                                                                                                                                                                                                                                                                                                                                                                                                                                                                                                                                                                                                                                                                                                        | EMBASE                                                                                                                                                                                                                                                                                                                                                                                                                                                                                                                                                                                                                                                                                                                                                                                                                                                                                                                                                                                                                                                                                                                                                                                                          | COCHRANE                                                                                                                                                                                                                                                                                                                                                                                                                                                                                                                                                                                                                                                   | CINAHL                                                                                                                                                                                                                                                                                                                                                                                                                                                                                                                                                                                                                                                                                                                                                                                                                                                                |
|------------------------------------------------------------------------------------------------------------------------------------------------------------------------------------------------------------------------------------------------------------------------------------------------------------------------------------------------------------------------------------------------------------------------------------------------------------------------------------------------------------------------------------------------------------------------------------------------------------------------------------------------------------------------------------------------------------------------------------------------------------------------------------------------------------------------------------------------------------------------------------------------------------------------------------------------------------------------------------------------------------------------------------------------------------------------------------------------------------------------------------------------------------------------------------------------------------------------------------------------------------------------------------------------|-----------------------------------------------------------------------------------------------------------------------------------------------------------------------------------------------------------------------------------------------------------------------------------------------------------------------------------------------------------------------------------------------------------------------------------------------------------------------------------------------------------------------------------------------------------------------------------------------------------------------------------------------------------------------------------------------------------------------------------------------------------------------------------------------------------------------------------------------------------------------------------------------------------------------------------------------------------------------------------------------------------------------------------------------------------------------------------------------------------------------------------------------------------------------------------------------------------------|------------------------------------------------------------------------------------------------------------------------------------------------------------------------------------------------------------------------------------------------------------------------------------------------------------------------------------------------------------------------------------------------------------------------------------------------------------------------------------------------------------------------------------------------------------------------------------------------------------------------------------------------------------|-----------------------------------------------------------------------------------------------------------------------------------------------------------------------------------------------------------------------------------------------------------------------------------------------------------------------------------------------------------------------------------------------------------------------------------------------------------------------------------------------------------------------------------------------------------------------------------------------------------------------------------------------------------------------------------------------------------------------------------------------------------------------------------------------------------------------------------------------------------------------|
| <p>1. Electric\$ stimulation.mp. or exp Electric Stimulation/<br/>           2. exp Electric Stimulation Therapy/<br/>           3. Electric stimulator.mp.<br/>           4. exp Electromagnetic Fields/ or Bone growth stimulation.mp.<br/>           5. Bone growth stimulator.mp.<br/>           6. Bone stim\$.mp.<br/>           7. Direct current.mp.<br/>           8. Capacitive coupling.mp.<br/>           9. Inductive coupling.mp.<br/>           10. Magnetic field therapy.mp. or exp Magnetic Field Therapy/ or exp Electromagnetic Fields/<br/>           11. Pulsed electromagnetic field\$.mp.<br/>           12. Combined magnetic field\$.mp.<br/>           13. Electrical stimulator.mp.<br/>           14. 1 or 2 or 3 or 4 or 5 or 6 or 7 or 8 or 9 or 10 or 11 or 12 or 13<br/>           15. Spin\$ fusion.mp.<br/>           16. exp Lumbar Vertebrae/ or exp Spinal Fusion/ or exp Cervical Vertebrae/ or exp Thoracic Vertebrae/<br/>           17. Spin# surgery.mp.<br/>           18. exp Spine/ or Spine.mp.<br/>           19. exp Fractures, Ununited/<br/>           20. Nonunion.mp.<br/>           21. Non-union.mp.<br/>           22. Delayed union.mp.<br/>           23. exp "Bone and Bones"/<br/>           24. exp Orthopedic Procedures/ or</p> | <p>1. Electric\$ stimulation.mp. or exp electrostimulation/<br/>           2. functional electrical stimulation/ or Electrical stimulation therapy.mp. or exp electrostimulation therapy/<br/>           3. Electric\$ stimulator.mp.<br/>           4. Bone growth stimulator.mp. or exp bone growth stimulator/<br/>           5. exp direct current/<br/>           6. capacitive coupling.mp.<br/>           7. inductive coupling.mp.<br/>           8. Magnetic field therapy.mp. or exp magnetotherapy/<br/>           9. Electromagnetic fields.mp. or exp electromagnetic field/<br/>           10. Pulsed electromagnetic field\$.mp. or exp pulsed electric field/<br/>           11. combined magnetic field\$.mp.<br/>           12. 1 or 2 or 3 or 4 or 5 or 6 or 7 or 8 or 9 or 10 or 11<br/>           13. thoracic spine/ or thoracolumbar spine/ or cervical spine/ or lumbar spine/ or spine fracture/ or exp spine fusion/ or spine fusion implant/ or exp spine/ or exp spine surgery/<br/>           14. exp fracture healing/ or exp fracture nonunion/ or exp fracture fixation/ or exp fracture treatment/ or exp fracture/<br/>           15. Nonunion.mp. or exp pseudarthrosis/</p> | <p>#1 MeSH descriptor: [Electric Stimulation] explode all trees<br/>           #2 Bone growth stimulator\$<br/>           #3 Electromagnetic fields<br/>           #4 Direct current<br/>           #5 Capacitive coupling<br/>           #6 Inductive coupling<br/>           #7 Magnetic field therapy<br/>           #8 Spinal fusion<br/>           #9 Spine surgery<br/>           #10 Fracture<br/>           #11 Nonunion<br/>           #12 Delayed union<br/>           #13 Fracture healing<br/>           #14 #1 or #2 or #3 or #4 or #5 or #6 or #7<br/>           #15 #8 or #9 or #10 or #11 or #12 or #13<br/>           #16 #14 and #15</p> | <p>S16. S10 AND S14 AND S15<br/>           S15. S6 OR S7 OR S8 OR S9 OR S11 OR S12 OR S13<br/>           S14. S1 OR S2 OR S3 OR S4 OR S5<br/>           S13. (MH "Orthopedic Surgery+")<br/>           S12. "bone"<br/>           S11. (MH "Spine+")<br/>           S10. (MH "Randomized Controlled Trials") OR (MH "Clinical Trials+")<br/>           S9. (MH "Fractures, Ununited+") OR "nonunion"<br/>           S8. (MH "Fracture Healing") OR (MH "Spinal Fractures+")<br/>           S7. "spine surgery"<br/>           S6. (MH "Spinal Fusion")<br/>           S5. (MH "Magnet Therapy") OR (MH "Magnetic Fields+") OR "magnetic field therapy"<br/>           S4. "direct current"<br/>           S3. "bone stimulator"<br/>           S2. "bone growth stimulators"<br/>           S1. (MH "Electric Stimulation+") OR "electrical stimulation or estim"</p> |

|                                                                                                                                                                                                                                                                                                                                                                            |                                                                                                                                                                                                                                                                                                                                                                                        |  |  |
|----------------------------------------------------------------------------------------------------------------------------------------------------------------------------------------------------------------------------------------------------------------------------------------------------------------------------------------------------------------------------|----------------------------------------------------------------------------------------------------------------------------------------------------------------------------------------------------------------------------------------------------------------------------------------------------------------------------------------------------------------------------------------|--|--|
| <p>exp Orthopedics/<br/> 25. exp Fracture Healing/<br/> 26. 15 or 16 or 17 or 18 or 19 or 20<br/> or 21 or 22 or 23 or 24 or 25<br/> 27. randomized controlled trial.pt.<br/> 28. controlled clinical trial.pt.<br/> 29. trial.ti.<br/> 30. placebo.ab.<br/> 31. Random*.ab.<br/> 32. 27 or 28 or 29 or 30 or 31<br/> 33. 14 and 26 and 32<br/> 34. limit 33 to humans</p> | <p>16. Delayed union.mp. or exp<br/> fracture nonunion/<br/> 17. exp bone/<br/> 18. exp orthopedics/<br/> 19. 13 or 14 or 15 or 16 or 17 or 18<br/> 20. trial.ti.<br/> 21. placebo.ab.<br/> 22. random*.ab.<br/> 23. randomized controlled trial/<br/> 24. exp controlled clinical trial/<br/> 25. 20 or 21 or 22 or 23 or 24<br/> 26. 12 and 19 and 25<br/> 27. limit 26 to human</p> |  |  |
|----------------------------------------------------------------------------------------------------------------------------------------------------------------------------------------------------------------------------------------------------------------------------------------------------------------------------------------------------------------------------|----------------------------------------------------------------------------------------------------------------------------------------------------------------------------------------------------------------------------------------------------------------------------------------------------------------------------------------------------------------------------------------|--|--|

## Appendix 2. Baseline characteristics of included trials<sup>1</sup>

| Lead Author       | Year | Country       | Funding                                                      | Indication/ Site                    | Experimental Group |         |                |                    | Control Group  |         |                |                    | Outcomes Reported                                                                                                                               |
|-------------------|------|---------------|--------------------------------------------------------------|-------------------------------------|--------------------|---------|----------------|--------------------|----------------|---------|----------------|--------------------|-------------------------------------------------------------------------------------------------------------------------------------------------|
|                   |      |               |                                                              |                                     | Mean Age (yrs)     | % Males | n <sup>2</sup> | Lost/ Missing data | Mean Age (yrs) | % Males | n <sup>3</sup> | Lost/ Missing data |                                                                                                                                                 |
| Adie              | 2011 | Australia     | Biomet                                                       | Acute fracture/ Tibia               | 38.5               | 80      | 44             | 85                 | 39.7           | 84      | 49             | 81                 | Proportion of patients requiring secondary intervention, radiographic union, SF-36 Physical Component Summary, Lower Extremity Functional Scale |
| Andersen (Part 1) | 2009 | Denmark       | Corporate/ Industry and Federal                              | Posterolateral fusion/ Lumbar spine | 69.3               | 39.0    | 53             | 6                  | 71.4           | 38.1    | 42             | 6                  | Dallas Pain Questionnaire, SF-36, Low Back Pain Rating Scale pain index, walking distance                                                       |
| Andersen (Part 2) | 2009 | Denmark       | Corporate/ Industry and Federal                              | Posterolateral fusion/ Lumbar spine | 69.3               | 39.0    | 55             | 0                  | 71.4           | 32.5    | 43             | 0                  | Fusion rate using thin slice CT and radiographs                                                                                                 |
| Barker            | 1984 | England       | NR                                                           | Nonunion/ Tibia                     | 38                 | NR      | 9              | 0                  | 29.9           | NR      | 7              | 0                  | Radiographic union, pain scores                                                                                                                 |
| Faldini           | 2010 | Italy         | IGEA                                                         | Acute fracture/ Femoral neck        | 69.4               | 16.6    | 30             | 7                  | 68.3           | 22.8    | 35             | 5                  | Radiographic union, onset of osteonecrosis, VAS pain scale                                                                                      |
| Goodwin           | 1999 | United States | Bioelectron                                                  | Fusion/ Lumbar Spine                | 45                 | 56.5    | 85             | 79                 | 40             | 52.1    | 94             | 79                 | Clinical and radiographic union                                                                                                                 |
| Hannemann         | 2014 | Netherlands   | Netherlands Organization for Health Research and Development | Acute fracture/ Scaphoid            | 35                 | 78      | 51             | 4                  | 34             | 75      | 51             | 7                  | Time to clinical and radiographic union, snuffbox tenderness, tenderness with scaphoid compression, wrist range of motion                       |
| Hannemann         | 2012 | Netherlands   | NR                                                           | Acute fracture/ Scaphoid            | 44.3               | 75      | 22             | 0                  | 37.7           | 79      | 21             | 2                  | Time to clinical and radiographic union, snuffbox tenderness, tenderness with scaphoid compression, wrist range of motion                       |

<sup>1</sup> NR = Not Reported

<sup>2</sup> Refers to the number analyzed

<sup>3</sup> Refers to the number analyzed

| Lead Author         | Year | Country        | Funding                   | Indication/ Site                                       | Experimental Group |                  |                |                    | Control Group  |                  |                |                    | Outcomes Reported                                                |
|---------------------|------|----------------|---------------------------|--------------------------------------------------------|--------------------|------------------|----------------|--------------------|----------------|------------------|----------------|--------------------|------------------------------------------------------------------|
|                     |      |                |                           |                                                        | Mean Age (yrs)     | % Males          | n <sup>2</sup> | Lost/ Missing data | Mean Age (yrs) | % Males          | n <sup>3</sup> | Lost/ Missing data |                                                                  |
| Linovitz            | 2002 | United States  | Corporate/ Industry       | Un-instrumented fusion/ Lumbar spine                   | 56.8               | 41               | 104            | 21                 | 56.6           | 36.4             | 97             | 21                 | Radiographic union                                               |
| Mammi               | 1993 | Italy          | NR                        | Osteotomy/ Tibia                                       | 62.9               | 22.2             | 18             | 2                  | 61.1           | 15.8             | 19             | 1                  | Radiographic union                                               |
| Martinez-Rondanelli | 2014 | Columbia       | Colciencias               | Acute Fracture/ Femoral diaphysis                      | 31                 | 82               | 32             | 0                  | 29             | 81               | 31             | 1                  | Radiographic union                                               |
| Mooney              | 1990 | United States  | NR                        | Interbody fusion (anterior or posterior)/ Lumbar spine | 37.9               | 59.1             | 98             | 9                  | 37.6           | 52.5             | 97             | 2                  | Radiographic union                                               |
| Scott               | 1994 | England        | None                      | Nonunion/ Femur, tibia                                 | 40.6               | 80               | 10             | 1                  | 45.8           | 73               | 11             | 1                  | Radiographic union                                               |
| Sharrard            | 1990 | England        | None                      | Delayed union/ Tibia                                   | 34.7               | 70               | 20             | 3                  | 45.4           | 72               | 25             | 3                  | Radiographic union, fracture movement, fracture pain/ tenderness |
| Shi                 | 2013 | China          | Third party non-corporate | Delayed union/ Long-bone <sup>4</sup>                  | 41.1               | NR               | 31             | 3                  | 38.4           | NR               | 27             | 3                  | Radiographic union, pain at fracture site                        |
| Simonis             | 2003 | United Kingdom | NR                        | Nonunion/ Tibia                                        | 31.7               | Very high but NR | 18             | 0                  | 32.3           | Very high but NR | 16             | 0                  | Radiographic union                                               |

**Appendix 3. Details of intervention and control arms with relative risk of radiographic nonunion in the included trials. PEMF = pulsed electromagnetic fields, DC = direct current, CC = capacitive current**

| Lead Author | Date | Type of stimulation | Company name                                    | Stimulator frequency (Hz), amplitude, other technical details                      | Treatment Frequency (hrs / day) | Treatment Duration                        | Placebo details               | Relative Risk of Radiographic Nonunion |
|-------------|------|---------------------|-------------------------------------------------|------------------------------------------------------------------------------------|---------------------------------|-------------------------------------------|-------------------------------|----------------------------------------|
| Adie        | 2011 | PEMF                | Biomet EBI Bone Healing System                  | NR                                                                                 | Recommended: 10, but at least 6 | 12 weeks                                  | Identical but Inactive device | 1.19 [0.65, 2.18]                      |
| Andersen    | 2009 | DC                  | Biomet Spine SpF-XL IIb Spine Fusion Simulator  | 40 uA and 100 uA                                                                   | 24                              | 6 months - 1 year after primary operation | Dummy electrodes, identical   | 0.97 [0.25, 1.17]                      |
| Barker      | 1984 | PEMF                | Custom design stimulator                        | 15 Hz, circumferential coils fitted around cast, 1.5 mT peak, 5ms burst waveform   | 10                              | 24 weeks                                  | Dummy device                  | 1.56 [0.39, 6.19]                      |
| Faldini     | 2010 | PEMF                | Igea BIOSTIM Igeastimulator                     | 75 Hz, 1.3 ms duration, 2mT peak magnetic field                                    | 8                               | 90 days                                   | Inactive device               | 0.17 [0.02, 1.23]                      |
| Goodwin     | 1999 | CC                  | Bioelectron Inc SpinalPak (now owned by Biomet) | 60 kHz sine wave, 5V peak-peak, 7.1-10.5 mA current. Electrodes placed 10cm apart. | 24                              | Until healed (maximum 9 months)           | Inactive device               | 0.52 [0.24, 1.14]                      |
| Hannemann   | 2014 | PEMF                | OSSATEC Bone Growth Stimulator                  | 15 Hz, 50 mV pulse amplitude, 5us pulse width, 62 ms burst refractory period       | 24                              | 6 weeks                                   | Inactive device               | 0.95 [0.06, 14.3]                      |
| Hannemann   | 2012 | PEMF                | OSSATEC Bone Growth Stimulator                  | 15 Hz, 50 mV pulse amplitude, 5us pulse width, 62 ms burst refractory period       | 24                              | 6 or 12 weeks depending on healing        | Inactive device               | 0.89 [0.37, 2.12]                      |
| Linovitz    | 2002 | PEMF                | Orthologic SpinaLogic                           | Single coil which produces low-energy combined magnetic fields                     | 0.5 (half hour)                 | 9 months                                  | Inactive device               | 0.63 [0.46, 0.86]                      |
| Mammi       | 1993 | PEMF                | Igea BIOSTIM Igeastimulator                     | 75Hz, 3mV, 1.3ms bursts. Two inductively coupled coils                             | 8                               | 60 days                                   | Inactive device               | 0.66 [0.42, 1.04]                      |

| Lead Author         | Date | Type of stimulation | Company name                                                              | Stimulator frequency (Hz), amplitude, other technical details                                          | Treatment Frequency (hrs / day) | Treatment Duration                                | Placebo details                              | Relative Risk of Radiographic Nonunion |
|---------------------|------|---------------------|---------------------------------------------------------------------------|--------------------------------------------------------------------------------------------------------|---------------------------------|---------------------------------------------------|----------------------------------------------|----------------------------------------|
| Martinez-Rondanelli | 2014 | PEMF                | Custom design stimulator (programmable settings for each patient)         | 5-105 Hz, 0.5 - 2 mT magnetic field                                                                    | 1                               | 8 weeks                                           | Inactive device                              | 0.7 [0.17, 2.9]                        |
| Mooney              | 1990 | PEMF                | Custom design stimulator (based on testing on rabbits)                    | Brace with multiple coils, 1.5 Hz, 1.8 G magnetic field                                                | 8                               | Until healed (although not specifically reported) | Inactive device                              | 0.49 [0.3, 0.82]                       |
| Scott               | 1994 | CC                  | Bioelectron OrthoPak Bone Growth Stimulator Systems (now owned by Biomet) | 60kHz, 5-10 V, Sine wave 3-6 V. Two stainless-steel disks                                              | NR                              | Average: 25.4 weeks                               | Inactive device with very small current flow | 0.43 [0.21, 0.88]                      |
| Sharrard            | 1990 | PEMF                | Custom design stimulator (likely same as Barker 1984)                     | 15 Hz. Two enclosed copper coils, Helmholtz configuration.                                             | 12                              | 12 weeks                                          | Inactive device                              | 0.63 [0.41, 0.95]                      |
| Shi                 | 2013 | PEMF                | OSSATEC Orthopulse II                                                     | 15 Hz, 50 mV pulse amplitude, 5us pulse width, 62 ms burst refractory period (taken from Punt's paper) | 8                               | Until healed (maximum of 3 months)                | Inactive device                              | 0.44 [0.21, 0.92]                      |
| Simonis             | 2003 | PEMF                | Custom design stimulator                                                  | 23.3 Hz, EMF Force: 150V, Field Intensity: 6A, 1.4 mT                                                  | 14                              | 26 weeks (6 months)                               | Inactive device                              | 0.22 [0.06, 0.9]                       |

**Appendix 4. Details of bony union definitions, time points assessed, modality of assessment, blinding, use of independent assessor and consensus judgment between reviewers for each included trials. NR = not reported.**

| Indication             | Lead author (Year) | How was union determined/ defined?                                                                                                                                                                         | Time point (mo) | Modality           | Blinding    | Independent assessor | Consensus judgment |
|------------------------|--------------------|------------------------------------------------------------------------------------------------------------------------------------------------------------------------------------------------------------|-----------------|--------------------|-------------|----------------------|--------------------|
| <b>Spine</b>           | Andersen (2009)    | Continuous bony bridge either between the transverse processes or at the lateral side of the facet joints on at least 1 side or a bilateral fusion of the facet joints                                     | 12              | Radiographs and CT | Sham device | NR                   | Reasonable         |
|                        | Goodwin (1999)     | - Fusion success required the presence of mature-appearing, uninterrupted bony masses bilaterally at the fusion levels<br>- $\geq 50\%$ assimilation of graft and vertebrae classified as successful union | 12              | Radiographs        | Sham device | Yes                  | Reasonable         |
|                        | Linovitz (2002)    | - Solid fusion defined as $\geq 75\%$ bony continuity without motion                                                                                                                                       | 9               | Radiographs        | Sham device | Yes                  | Reasonable         |
|                        | Mooney (1990)      | - $\geq 50\%$ bony assimilation defined as solid fusion.<br>- In an arthrodesis spanning 2 segments, both levels had to be graded as solidly fused for the patient to be classified as a success.          | 12              | Radiographs        | Sham device | Yes                  | Reasonable         |
| <b>Fresh Fractures</b> | Adie (2011)        | Union of three of four cortices (75%)                                                                                                                                                                      | 6               | Radiographs        | Sham device | Yes                  | Reasonable         |
|                        | Faldini (2010)     | Union was defined as at least 70% of the fracture ends were linked by bone trabeculae.                                                                                                                     | 3               | Radiographs        | Sham device | NR                   | Reasonable         |
|                        | Hannemann (2012)   | Union defined as $\geq 75\%$ trabecular bridging                                                                                                                                                           | 12              | CT                 | Sham device | Yes                  | Reasonable         |
|                        | Hannemann          | Union defined as $\geq 75\%$ trabecular                                                                                                                                                                    | 12              | CT                 | Sham        | Yes                  | Reasonable         |



|                                    |                            |                                                                                                                                                                                                                                                                                                                                                   |     |             |             |     |                |
|------------------------------------|----------------------------|---------------------------------------------------------------------------------------------------------------------------------------------------------------------------------------------------------------------------------------------------------------------------------------------------------------------------------------------------|-----|-------------|-------------|-----|----------------|
|                                    | (2014)                     | bridging                                                                                                                                                                                                                                                                                                                                          |     |             | device      |     |                |
|                                    | Martinez-Rondanelli (2014) | Radiologist classified the fracture healing in one of three alternatives: non-union, partial union, or complete union.                                                                                                                                                                                                                            | 6   | Radiographs | Sham device | NR  | Not reasonable |
| <b>Nonunion/<br/>Delayed union</b> | Barker (1984)              | - Mechanical stressing and limb surface goniometer assessments for mobility in both planes<br>- If lack of mobility suspected, stress radiographs in both planes and tibial behaviour during stressing using image intensification, if lack of mobility was suspected (if both unable to detect movement), fracture defined as clinically united. | 6   | Radiographs | Sham device | Yes | Not reasonable |
|                                    | Scott (1994)               | - Nonunion defined as at least nine months had elapsed since the injury and there had been no clinical or radiographic signs of progress toward healing, at the site of the fracture, for at least three months before the patient was entered into the study.                                                                                    | 9   | Radiographs | Sham device | NR  | Not reasonable |
|                                    | Sharrard (1990)            | Full union defined as dense and extensive new bone formation across at least 3 of 4 cortices ( $\geq 75\%$ )                                                                                                                                                                                                                                      | 3   | Radiographs | Sham device | Yes | Reasonable     |
|                                    | Shi (2013)                 | Union defined as no pain during joint stressing or during motion at the fracture site, and callus bridging present on 3 of 4 cortices ( $\geq 75\%$ )                                                                                                                                                                                             | 9.6 | Radiographs | Sham device | Yes | Reasonable     |
|                                    | Simonis (2003)             | - Loss of distinction at the fracture gap,<br>- Cortical bridging<br>- Trabecular bridging.<br>All three criteria required for radiographic union                                                                                                                                                                                                 | 6   | Radiographs | Sham device | No  | Not reasonable |
| <b>Osteotomy</b>                   | Mammi (1993)               | - Complete union defined as bridging across entire length of osteotomy site                                                                                                                                                                                                                                                                       | 2   | Radiographs | Sham device | Yes | Reasonable     |

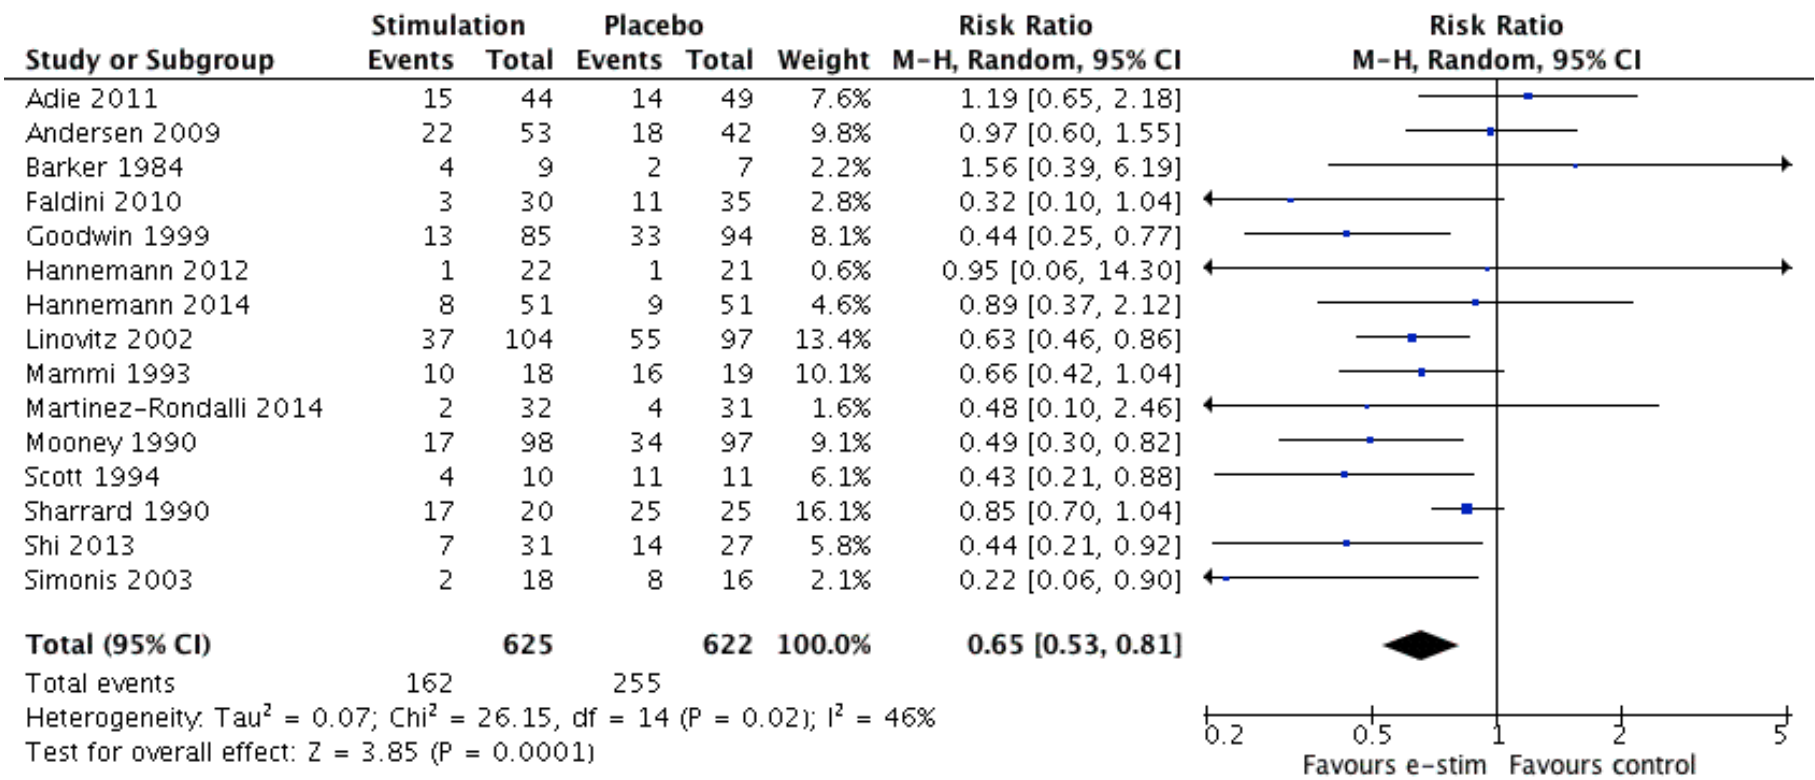

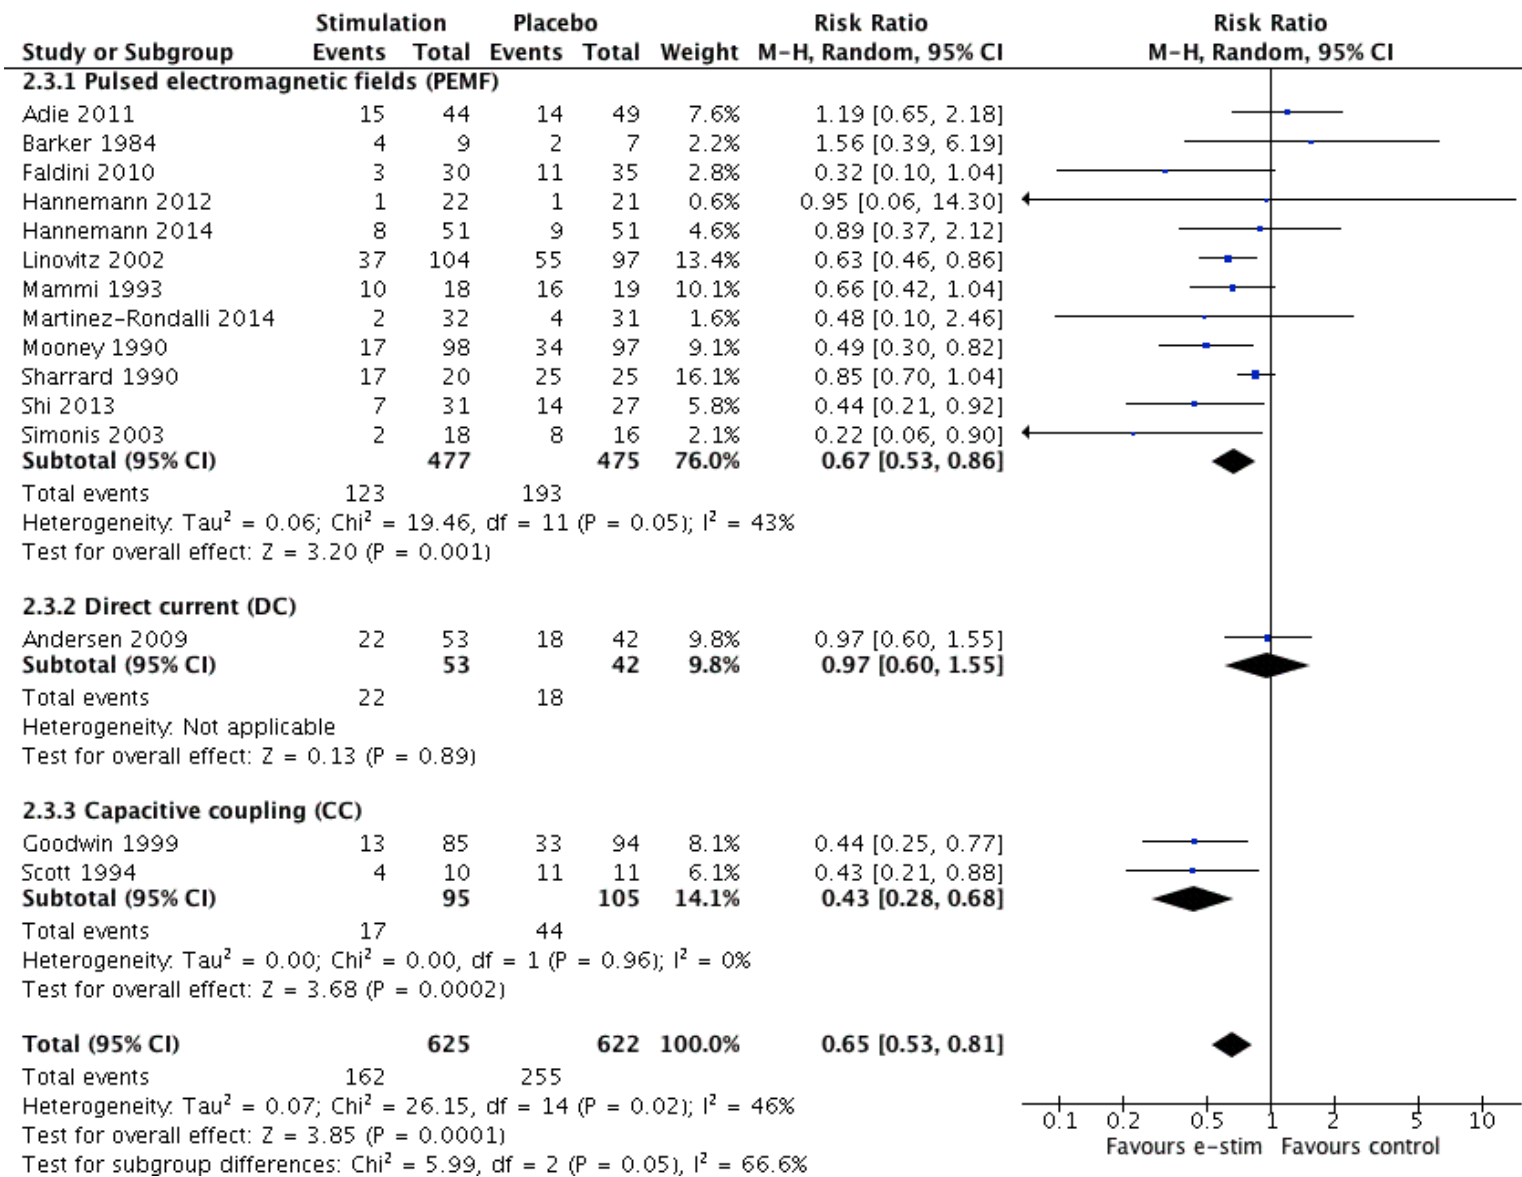

**Appendix 7. Sensitivity analysis of missing data at various thresholds for the outcome of radiographic nonunion**

| <b>Assumed intervention event rates compared to those successfully followed</b> | <b>Pooled Relative Risk (95% CI, p-value)</b> |
|---------------------------------------------------------------------------------|-----------------------------------------------|
| <b>Complete Case Analysis</b>                                                   | 0.65 (0.53 to 0.81, p < 0.01)                 |
| <b>1.5:1</b>                                                                    | 0.71 (0.56 to 0.89, p < 0.01)                 |
| <b>2:1</b>                                                                      | 0.74 (0.58 to 0.96, p = 0.02)                 |
| <b>2.5:1</b>                                                                    | 0.79 (0.60 to 1.03, p = 0.08)                 |

| PRISMA Checklist          |         |                                                                                                                                                                                                                                                                                                        |                                                |
|---------------------------|---------|--------------------------------------------------------------------------------------------------------------------------------------------------------------------------------------------------------------------------------------------------------------------------------------------------------|------------------------------------------------|
| Section/topic             | Item No | Checklist item                                                                                                                                                                                                                                                                                         | Reported on page No                            |
| <b>Title</b>              |         |                                                                                                                                                                                                                                                                                                        |                                                |
| Title                     | 1       | Identify the report as a systematic review, meta-analysis, or both                                                                                                                                                                                                                                     | 1 (Title page)                                 |
| <b>Abstract</b>           |         |                                                                                                                                                                                                                                                                                                        |                                                |
| Structured summary        | 2       | Provide a structured summary including, as applicable, background, objectives, data sources, study eligibility criteria, participants, interventions, study appraisal and synthesis methods, results, limitations, conclusions and implications of key findings, systematic review registration number | 2<br>Systematic review registration number N/A |
| <b>Introduction</b>       |         |                                                                                                                                                                                                                                                                                                        |                                                |
| Rationale                 | 3       | Describe the rationale for the review in the context of what is already known                                                                                                                                                                                                                          | 3                                              |
| Objectives                | 4       | Provide an explicit statement of questions being addressed with reference to participants, interventions, comparisons, outcomes, and study design (PICOS)                                                                                                                                              | 3                                              |
| <b>Methods</b>            |         |                                                                                                                                                                                                                                                                                                        |                                                |
| Protocol and registration | 5       | Indicate if a review protocol exists, if and where it can be accessed (such as web address), and, if available, provide registration information including registration number                                                                                                                         | Review protocol N/A                            |
| Eligibility criteria      | 6       | Specify study characteristics (such as PICOS, length of follow-up) and report characteristics (such as years considered, language, publication status) used as criteria for eligibility, giving rationale                                                                                              | 4-5                                            |
| Information sources       | 7       | Describe all information sources (such as databases with dates of coverage, contact with study authors to identify additional studies) in the search and date last searched                                                                                                                            | 4                                              |
| Search                    | 8       | Present full electronic search strategy for at least one database, including                                                                                                                                                                                                                           | Appendix 1                                     |

| Section/topic                      | Item No | Checklist item                                                                                                                                                                                                        | Reported on page No                        |
|------------------------------------|---------|-----------------------------------------------------------------------------------------------------------------------------------------------------------------------------------------------------------------------|--------------------------------------------|
|                                    |         | any limits used, such that it could be repeated                                                                                                                                                                       |                                            |
| Study selection                    | 9       | State the process for selecting studies (that is, screening, eligibility, included in systematic review, and, if applicable, included in the meta-analysis)                                                           | 4-5                                        |
| Data collection process            | 10      | Describe method of data extraction from reports (such as piloted forms, independently, in duplicate) and any processes for obtaining and confirming data from investigators                                           | 5-6                                        |
| Data items                         | 11      | List and define all variables for which data were sought (such as PICOS, funding sources) and any assumptions and simplifications made                                                                                | 5-6                                        |
| Risk of bias in individual studies | 12      | Describe methods used for assessing risk of bias of individual studies (including specification of whether this was done at the study or outcome level), and how this information is to be used in any data synthesis | 5                                          |
| Summary measures                   | 13      | State the principal summary measures (such as risk ratio, difference in means).                                                                                                                                       | 6                                          |
| Synthesis of results               | 14      | Describe the methods of handling data and combining results of studies, if done, including measures of consistency (such as I <sup>2</sup> statistic) for each meta-analysis                                          | 7-8                                        |
| Risk of bias across studies        | 15      | Specify any assessment of risk of bias that may affect the cumulative evidence (such as publication bias, selective reporting within studies)                                                                         | 7 (publication bias); 9 (GRADE assessment) |
| Additional analyses                | 16      | Describe methods of additional analyses (such as sensitivity or subgroup analyses, meta-regression), if done, indicating which were pre-specified                                                                     | Sensitivity analyses - 8                   |
| <b>Results</b>                     |         |                                                                                                                                                                                                                       |                                            |
| Study selection                    | 17      | Give numbers of studies screened, assessed for eligibility, and included in the review, with reasons for exclusions at each stage, ideally with a flow diagram                                                        | 9, Figure 1 (page 28)                      |
| Study characteristics              | 18      | For each study, present characteristics for which data were extracted (such as study size, PICOS, follow-up period) and provide the citations                                                                         | 10-11, Appendix 2-4                        |
| Risk of bias within                | 19      | Present data on risk of bias of each study and, if available, any outcome-                                                                                                                                            | 11                                         |

| Section/topic                 | Item No | Checklist item                                                                                                                                                                                            | Reported on page No                    |
|-------------------------------|---------|-----------------------------------------------------------------------------------------------------------------------------------------------------------------------------------------------------------|----------------------------------------|
| studies                       |         | level assessment (see item 12).                                                                                                                                                                           | Figure 2-3                             |
| Results of individual studies | 20      | For all outcomes considered (benefits or harms), present for each study (a) simple summary data for each intervention group and (b) effect estimates and confidence intervals, ideally with a forest plot | 11-12<br>Figures 4-6<br>Appendices 5-6 |
| Synthesis of results          | 21      | Present results of each meta-analysis done, including confidence intervals and measures of consistency                                                                                                    | 11-12<br>Figures 4-6<br>Appendices 5-6 |
| Risk of bias across studies   | 22      | Present results of any assessment of risk of bias across studies (see item 15)                                                                                                                            | 11<br>Figures 2-3                      |
| Additional analysis           | 23      | Give results of additional analyses, if done (such as sensitivity or subgroup analyses, meta-regression) (see item 16)                                                                                    | 12-13<br>Appendix 7                    |
| <b>Discussion</b>             |         |                                                                                                                                                                                                           |                                        |
| Summary of evidence           | 24      | Summarise the main findings including the strength of evidence for each main outcome; consider their relevance to key groups (such as health care providers, users, and policy makers)                    | Page 14-16                             |
| Limitations                   | 25      | Discuss limitations at study and outcome level (such as risk of bias), and at review level (such as incomplete retrieval of identified research, reporting bias)                                          | 14                                     |
| Conclusions                   | 26      | Provide a general interpretation of the results in the context of other evidence, and implications for future research                                                                                    | 17                                     |
| <b>Funding</b>                |         |                                                                                                                                                                                                           |                                        |
| Funding                       | 27      | Describe sources of funding for the systematic review and other support (such as supply of data) and role of funders for the systematic review                                                            | 25                                     |
